# Supplementary material
Source: PubMed Central journal article supplement (PMC3700702)
Supplement: CJN.11181012_CJN11181012SupplementaryData.pdf [file CJN.11181012_CJN11181012SupplementaryData.pdf]

**SUPPLEMENTAL TABLES**

**Supplemental Table 1. Adjusted\* Association of 24 Hour Urine Phosphorus Excretion (UPE) with Mortality and Cardiovascular Disease Events Stratified by Chronic Kidney Disease**

|                     | Urine Phosphorus Excretion Tertiles |                   |                   | Continuous                   |              |         |
|---------------------|-------------------------------------|-------------------|-------------------|------------------------------|--------------|---------|
|                     | Tertile I                           | Tertile II        | Tertile III       | per 300 mg/day<br>higher UPE | (95% CI)     | p value |
| UPE range (mg/day)  | < 508                               | 508-748           | > 748             |                              |              |         |
| <b>No-CKD</b>       |                                     |                   |                   |                              |              |         |
| All-cause Mortality | 1.00 (Ref)                          | 0.77 (0.53, 1.13) | 0.69 (0.47, 1.03) | 0.93                         | (0.79, 1.10) | 0.39    |
| CVD events          | 1.00 (Ref)                          | 0.80 (0.51, 1.26) | 0.64 (0.40, 1.04) | 0.81                         | (0.66, 0.99) | 0.047   |
| <b>CKD</b>          |                                     |                   |                   |                              |              |         |
| All-cause Mortality | 1.00 (Ref)                          | 1.08 (0.76, 1.53) | 0.79 (0.51, 1.22) | 0.0.94                       | (0.79, 1.11) | 0.46    |
| CVD events          | 1.00 (Ref)                          | 0.75 (0.47, 1.20) | 0.72 (0.43, 1.22) | 0.83                         | (0.66, 1.04) | 0.11    |

\*adjusted for age, sex, oral estrogen use (women), race, eGFR, diabetes, hypertension, smoking, body mass index, cholesterol, HDL, and CRP.

p-interaction (UPE\*CKD) for mortality = 0.95; p-interaction (UPE\*CKD) for CVD events= 0.87

**Supplemental Table 2. Adjusted\* Association of 24 Hour Urine Phosphorus Excretion (UPE) with Mortality and Cardiovascular Disease (CVD) Events in Sensitivity Analysis Among 653 Individuals with Concordant 24 hour Urine Measured and Cockcroft-Gault Estimated Creatinine Clearance.**

|                    | Urine Phosphorus Excretion Tertiles |                   |                   | Continuous                   |              |         |
|--------------------|-------------------------------------|-------------------|-------------------|------------------------------|--------------|---------|
|                    | Tertile I                           | Tertile II        | Tertile III       | per 300 mg/day<br>higher UPE | (95% CI)     | p value |
| n                  | 197                                 | 223               | 233               |                              |              |         |
| UPE range (mg/day) | < 508                               | 508-748           | > 748             |                              |              |         |
| Mortality          | 1.00 (Ref)                          | 0.95 (0.70, 1.31) | 0.74 (0.52, 1.06) | 0.91                         | (0.78, 1.07) | 0.24    |
| CVD event          | 1.00 (Ref)                          | 0.98 (0.67, 1.44) | 0.74 (0.48, 1.16) | 0.82                         | (0.67, 1.00) | 0.053   |

\* adjusted for age, sex, oral estrogen use (women), race, eGFR, diabetes, hypertension, smoking, BMI, cholesterol, HDL, and CRP
